# Supplementary material for: A sensitive electrochemical aptasensor for detection of Aflatoxin B2 based on a polyacrylamide/phytic acid/polydopamine hydrogel modified screen printed carbon electrode
Source: Royal Society of Chemistry journal article supplement (doi:10.1039/c8ay01675e), 2018-01-01
Supplement: c8ay01675e1.pdf [file c8ay01675e1.pdf]

Electronic Supplementary Information (ESI) for:

**Sensitive electrochemical aptasensor for detection of Aflatoxin B2  
based on polyacrylamide/phytic acid/polydopamine hydrogel  
modified screen printed carbon electrode**

Girma Selale Geleta,<sup>a,b,c</sup> Zhen Zhao,<sup>a,b</sup> Zhenxin Wang<sup>a,\*</sup>

<sup>a</sup> State Key Laboratory of Electroanalytical Chemistry, Changchun Institute of Applied Chemistry, Chinese Academy of sciences, Changchun 130022, China.

<sup>b</sup> University of Chinese Academy of Sciences, Beijing, 100039, China.

<sup>c</sup> Jimma University, College of Natural Sciences, Department of Chemistry, Jimma, 378, Ethiopia.

\*Corresponding author: Phone/Fax: (+86) 431-85262243. E-mail: wangzx@ciac.ac.cn

Contents

1. Additional Figures S1-S6
2. Additional Table S1
3. Additional References

## 2. Additional Figures

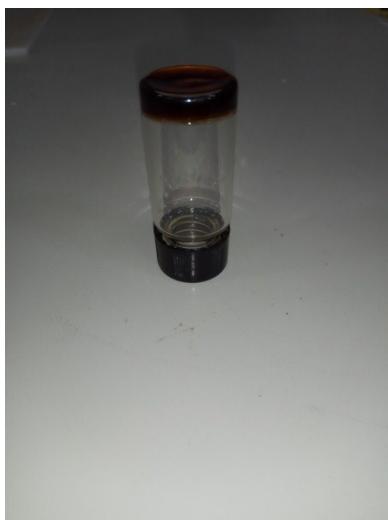

**Fig.S1** A photograph of the PAM/PA/PDA hydrogel inside a glass vial.

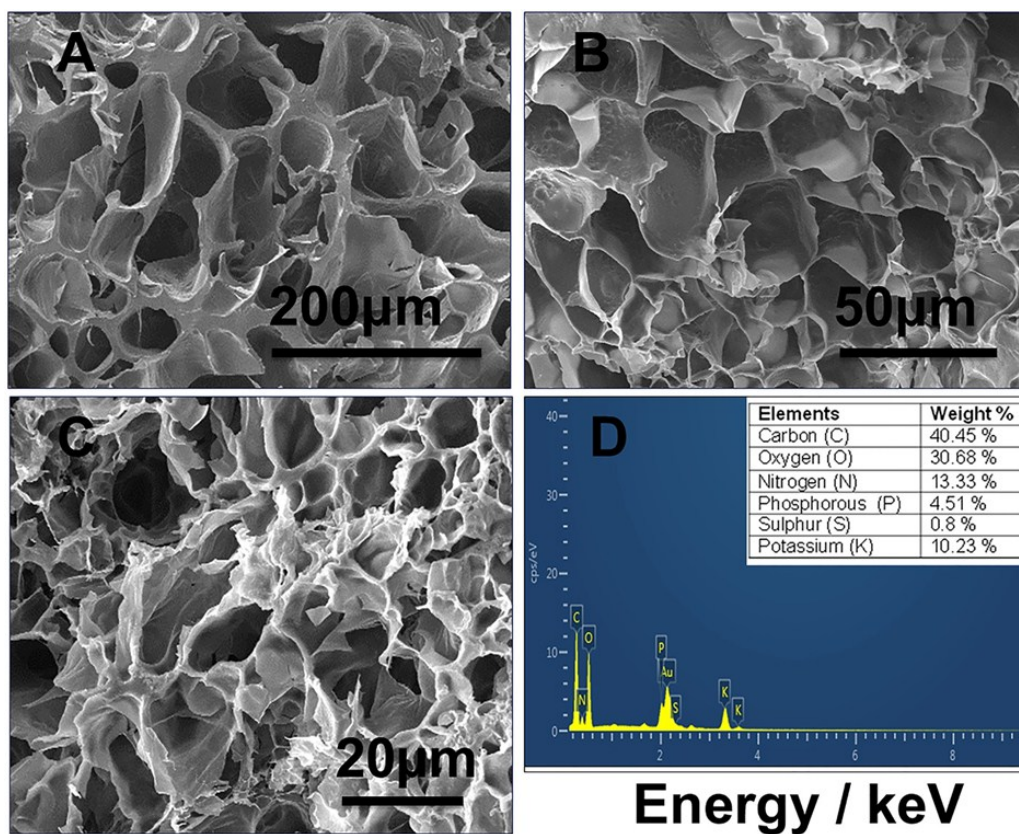

**Fig.S2** (A, B and C) SEM micrographs of PAM/PA/PDA hydrogel of different magnification and (D) EDX of PAM/PA/PDA hydrogel

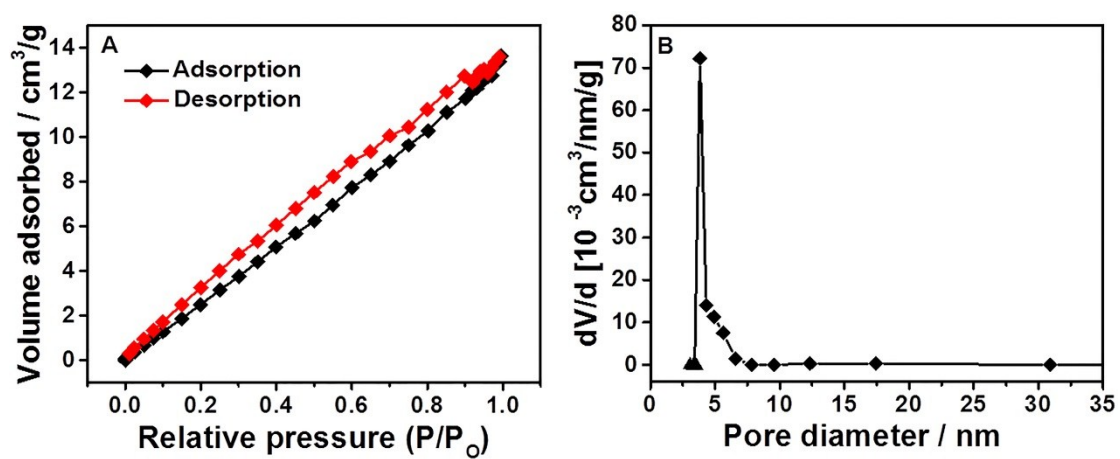

**Fig.S3** (A) N<sub>2</sub> adsorption-desorption isotherms, (B) BJH pore-size distribution of dehydrated PAM/PA/PDA hydrogel.

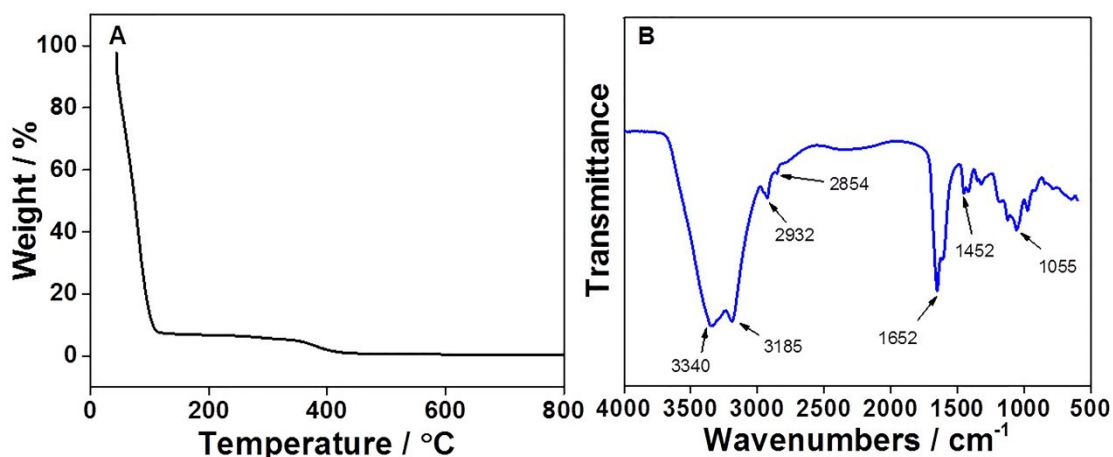

**Fig.S4** (A) Thermal gravimetric analysis of PAM/PA/PDA hydrogel and (B) FTIR spectrum of PAM/PA/PDA hydrogel.

The H<sub>2</sub>O content of the PAM/PA/PDA hydrogel was around 90 % (wt/wt) (as shown in Fig.S4A). The high H<sub>2</sub>O content arises from hydrophilic functional groups attached to the polymeric backbone, which provides a favourable microenvironment for immobilizing biomolecules.<sup>S1,S2</sup> The FTIR spectrum of PAM/PA/PDA hydrogel is shown in Fig.S4B. The characteristic peak at 3340 cm<sup>-1</sup> and 3185 cm<sup>-1</sup> are assigned to asymmetric and symmetric stretching vibrations of NH<sub>2</sub>.<sup>S3</sup> Whereas the broad peak around 3300 cm<sup>-1</sup> is attributed to stretching vibrations of OH that indicate an abundance of hydroxyl groups.<sup>S4</sup> In addition, the strong absorption peaks at 1652 cm<sup>-1</sup> and 1609 cm<sup>-1</sup> are arised from the vibrations of C=O and C=C, respectively.<sup>S5</sup> Beside the band at 1452 cm<sup>-1</sup> is associated with the vibration of C-N (C-N stretching for primary amide), and the characteristic bands of PO<sub>4</sub><sup>3-</sup> are appeared at 1055 cm<sup>-1</sup>. This result confirmed presence of abundant functional groups on the surface of PAM/PA/PDA hydrogel which is considered advantageous for immobilizing aptamer onto an electrode surface.

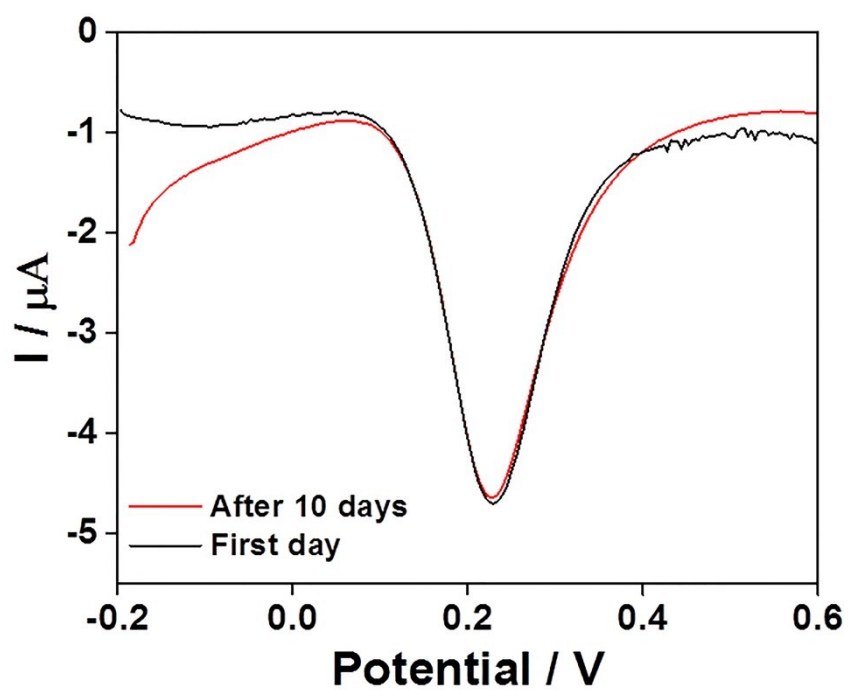

Fig.S5 Stability of the proposed SPCE/PAM/PA/PDA/Apt.

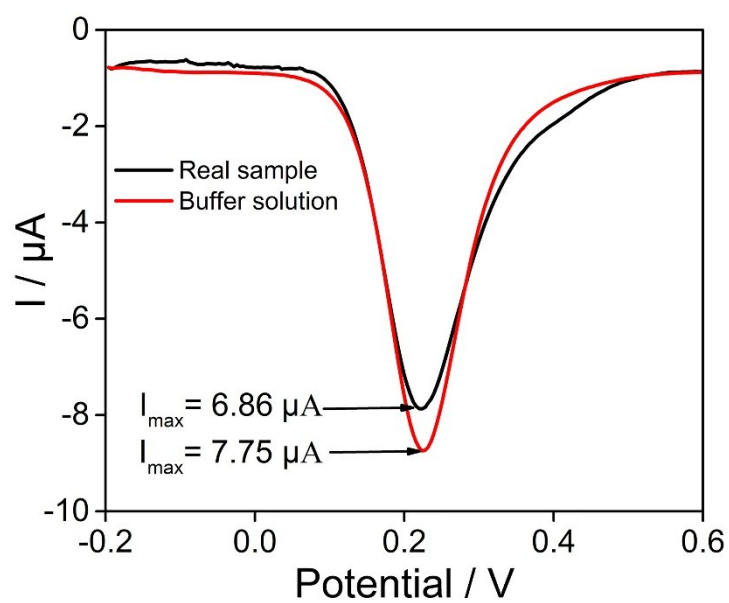

**Fig.S6** DPV responses of the SPCE/PAM/PA/PDA/Apt in buffer and real samples containing  $[\text{Fe}(\text{CN})_6]^{3-/4-}$  redox couple ( $5 \text{ mmol L}^{-1}$ ) without AFB2.

### 3. Additional Table

**Table S1.** Optimization of precursor concentrations and reaction conditions for preparation of PAM/PA/PDA hydrogel

| PAM/PA/PDA hydrogels | DA/AM (wt%) | AM (g) | KPS/AM (wt%) | TMEDA ( $\mu$ L) | MBA/AM (wt%) | Water ( $\mu$ L) | PA/AM (wt%) | Time (min) |
|----------------------|-------------|--------|--------------|------------------|--------------|------------------|-------------|------------|
| A                    | 0.5         | 0.28   | 8            | 20               | 0.27         | 250              | 0.31        | 1          |
| B                    | 0.5         | 0.28   | 8            | 5                | 0.27         | 250              | 0.31        | 3          |
| C                    | 0.5         | 0.28   | 8            | 1                | 0.27         | 250              | 0.31        | 8          |
| D                    | 0.8         | 0.28   | 8            | 2                | 0.27         | 250              | 0.31        | 15         |
| E                    | 0.8         | 0.28   | 8            | 0.5              | 0.27         | 250              | 0.31        | 120        |
| F                    | 4.65        | 0.28   | 8            | 0.5              | 0.27         | 250              | 0.31        | -          |

**Chemicals used:** dopamine (DA), acrylamide (AM), potassium peroxydisulfate (KPS), N, N'-Methylene bisacrylamide (MBA) and tetramethylethylenediamine (TMEDA).

The polymerization parameters such as reaction time, monomer concentration, and initiator concentration were optimized to obtain PAM/PA/PDA hydrogels of desired properties. As shown in Table S1, the PAM/PA/PDA hydrogel cannot form when the weight ratios of DA/AM were higher than 0.8wt%, because the reductive DA molecules affected the activity of the initiator (KPS) and thus retard the polymerization of AM monomers.<sup>S6</sup> In this regard, row D was selected for preparation of PAM/PA/PDA hydrogel by taking into consideration the modification time of SPCEs.

#### 4. Additional References

- S1 F. Qu, Y. Zhang, A. Rasooly, M. Yang, *Anal. Chem.*, 2014, **86**, 973–976.
- S2 D. Buenger, F. Topuz, J. Groll, *Prog. Polym. Sci.*, 2012, **37**, 1678–1719.
- S3 Q. Wu, J. Wei, B. Xu, X. Liu, H. Wang, W. Wang, Q. Wang, W. Liu, *Sci. Rep.*, 2017, **7**, 1–11.
- S4 D. Kim, Y. Choi, E. Shin, Y.K. Jung, B.S. Kim, *RSC Adv.*, 2014, **4**, 23210–23213.
- S5 Z. Zhao, H. Chen, H. Zhang, L. Ma, Z. Wang, *Biosens. Bioelectron.*, 2017, **91**, 306–312.
- S6 L. Han, L. Yan, K. Wang, L. Fang, H. Zhang, Y. Tang, Y. Ding, L.T. Weng, J. Xu, J. Weng, Y. Liu, F. Ren, X. Lu, Tough, *NPG Asia Mater.*, 2017, **9**, e372.
